# Supplementary material for: One-Step Affinity Purification of Leucine-Rich α2-Glycoproteins from Snake Sera and Characterization of Their Phospholipase A2-Inhibitory Activities as β-Type Phospholipase A2 Inhibitors
Source: MDPI journal article supplement (doi:10.3390/toxins16030126), 2024-03-01
Supplement: s1 [file s1]

# **Supplementary Materials: One-Step Affinity Purification of Leucine-Rich $\alpha$ 2-Glycoproteins from Snake Sera and Characterization of Their Phospholipase A2-Inhibitory Activities as $\beta$ -Type Phospholipase A2 Inhibitors**

Ryoichi Shirai, Kana Shibata, Shinobu Fujii, Rikiro Fukunaga and Seiji Inoue

|       |                                                                     |             |
|-------|---------------------------------------------------------------------|-------------|
| 1     | AGTGTCCAAAAGGCTGGCAGGAGTGAGGTTTGGACAGAGTTCCAGGATGAAGTCT             | 55          |
| (-23) |                                                                     | M K S (-21) |
| 56    | TCGGTTCTAGCACTTCTGATCATCTGCCTTGTGATGTCTTCAACAGCTACACCCAGCAGGTTCTT   | 121         |
| (-20) | S V L A L L I I C L V M S F N S Y T Q Q <u>V L</u>                  | (2)         |
| 122   | TATTGCCCAACCGATCCTGCTCCAGAAAATATCACTGAGTTTGGCTGCAACTCCCCATCTCTCCAT  | 187         |
| (3)   | <u>Y C P P D P A P E N I T E F G C N S P S L H</u>                  | (24)        |
| 188   | GAATTTCCCACTGGCTTCCCTGTACGAACCAAACTTATCTCCATTGAGTTCACCCAGCTCTCCAGC  | 253         |
| (25)  | E F P T G F P V R T K L I S I E F T Q L S S                         | (46)        |
| 254   | CTTGGCGTGGAAGCCCTCCAAGATCTTCAAACCTCCAGGAACCTTCACTCTCCAACAACAGGCTG   | 319         |
| (47)  | L G V E A L Q D L P N L Q E L H L S N N R L                         | (68)        |
| 320   | AAGACCTTCCCACTGGCCTCTTCCGTAACCTCCAGAAATTGCACACCTGGATCTGTCCACCAAT    | 385         |
| (69)  | K T L P S G L F R N L P E L H T L D L S T N                         | (90)        |
| 386   | CTCCTGGAAGATCTACCCCCAGAGATCTTACCAACGCAACCAACCTGATGCTTTTATCCATCAGT   | 451         |
| (91)  | L L E D L P P E I F T <b>N</b> A T N L M L L S I S                  | (112)       |
| 452   | GAAAACCGACTGGCTGAGCTGCGGGCATCCTGGTTCGAAAACCTGAAGGAACTTAAGATCCTGAGC  | 517         |
| (113) | E N R L A E L R A S W F E T L K E L K I L S                         | (134)       |
| 518   | CTTGACCAAAACAGCTGAAGGAGGTCCCCATTTCTTGTTTCTCCAAGCTGAAGAAGTTGACCTTT   | 583         |
| (135) | L D Q N Q L K E V P I S C F S K L K K L T F                         | (156)       |
| 584   | CTAGATCTCTCCTCCAATCGCCTCCATCATCTCTCTCCAGACATGTTACGCGCCTAGAAAATTTG   | 649         |
| (157) | L D L S S N R L H H L S P D M F S G L E N L                         | (178)       |
| 650   | GAGAGTTGACCTTGGAATAACCAATCCGATGCATTGCCCGAGATCCTTCCATTGGGGACCC       | 715         |
| (179) | E R L T L E N N P I R C I A P R S F H W G P                         | (200)       |
| 716   | AAGCTGAGCATGATCTCCCTGAGGAACTGCAGCCTGACCGATATCACCTTTGGGGAATTTAGCCG   | 781         |
| (201) | K L S M I S L R <b>N</b> C S L T D I T F G E F Q P                  | (222)       |
| 782   | TTGGACCAACTGGTGCTGCTGGATCTCTCCGCCAATGAGCTCACCAGGCTGGATCCTCCAGCCGGC  | 847         |
| (223) | L D Q L V L L D L S A N E L T R L D P P A G                         | (244)       |
| 848   | ATCCTGTCTGCCAATCTCAGCCTGGATCTTGCAAGAAATCCTTGGGTGTGTGACTGCCGCTGGAC   | 913         |
| (245) | I L S A <b>N</b> L S L D L A G N P W V C D C R L D                  | (266)       |
| 914   | AATCTTCTAACCTGGGTCAAGGAGCACAAGATCCATTTATTTTCCAAGCAGGAAATTTGTCTGTGCT | 979         |
| (267) | N L L T W V K E H K I H L F S K Q E I V C A                         | (288)       |
| 980   | TTCCCCAAGAATTTCAAAGGCGAAGAGGCAACCTCACTTCATCGATCCCAAATTTGTCCCTGCTAA  | 1045        |
| (289) | F P K N F K G E E A T S L H R S Q I C P C                           | (309)       |
| 1046  | ACCTTTAAATAGATCCTTTTCTTTCCACCCTGCTTCGCGAACAGCGAGATTTCCAGTTTGGAGAC   | 1111        |
| 1112  | AATTTCCAGTTGAATTGGACTTCAACTCCCAGAAATCTCAGCAACAGCCATGCTGCCTGGGGAATT  | 1177        |
| 1178  | CTGGGAGTTGGAGTCCACATAGCTGGATTTAAAGAGAAGAGACAGAACAGGATTGGGAAAAAAT    | 1243        |
| 1244  | ACGAAATACTGATTTTAGGGAAGAAATAGCTGCTCAGGAAGAGATGCTCAAAAAAATCAACAATA   | 1309        |
| 1310  | TAGGTAGTCCTTCACTTACAACCGTTCAGTTAGTGACTTTTTGAAGTATTAAGAGCCCTGAAGAAA  | 1375        |
| 1376  | GTGACCGATGAGTGGATCAGAATCAGAATAGAGCTGCAAGGGACCTTGAGGTCTTCTAGTCCAAC   | 1441        |
| 1442  | CCCTGCTCAAGCAGGAGACCTCTGCCATTTAGCAAGCAACTGTCAGTCTCTTCTTGAAAACT      | 1507        |
| 1508  | GATGGAGCACCACAACCTTCTGGTGGCAAGCTGTTCCACTGATTAATTGTTCCCTGTCAGGAAGTTT | 1573        |
| 1574  | CTCCTTAGTTCTAGGTTGCTTCCCTCCTTGATTAATTTCCATCCTTTGCTTCTTGCTCCTGCCCTCA | 1639        |
| 1640  | GGTGCTTTGAAGAAATAGCTTGACTCCCTCTTCTTTGTGGCAGCCCTCAAATATTGGAAGACTGAT  | 1705        |
| 1706  | ATCATGTACCCCTTAGTGCTTCTCAGAGCTGACTGTTTTGCTGTTTTCTATTATTATTAGTGTAGGG | 1771        |
| 1772  | TGCTGTTACATTAGCCAGGAGTCTGCAATGCTACTGAAGCGTAGTACTTTGCCTGCAATCTACTA   | 1837        |
| 1838  | GCTCTGTTATGGTACATGCTCAGCACATCCCAAGGTGCACCACAGGAGAGCGAGCTAGCTTTGCA   | 1903        |
| 1904  | ACAGAAAGAAAGACAAGCAGCTTTTCTGAGCATTAGCCAAGCCCTTTCCCTCCCTCCACCGTG     | 1969        |
| 1970  | ACCACCTCGCAAGCGGGCATCGCAATGGGAAGGTTCAAAGCGGACAGAAATTTGACTGCCTGCAC   | 2035        |
| 2036  | AGAGCACCAAGTCGTCTCCCCCTCAAAGTGGTACCTATTTGTCTACAGGCGGTATATATGATTTTG  | 2101        |
| 2102  | AGCTGCTAGGTGGGCAGAAGCTGAGGCAAGTTGGGAGCTCATCCTGTACGCAGTGCTAGGGCTC    | 2167        |
| 2168  | GAACCACTGGAGCAGAGACCAACTCCAGCATCATTAAGCCACTGAGCCAATGTACTTCTCTGTTTC  | 2233        |
| 2234  | GCTGTTGAATAAACCTTATTTCCACTTCAAAAAAAAAAAAAAAAAAAAAAAAAAAAAA          | 2290        |

**Supplementary Figure S1. The nucleotide and deduced amino acid sequences of *Laticauda semifasciata* LRG.** The N-terminal sequence elucidated by sequencing the purified *L. semifasciata* LRG is underlined. Potential N-glycosylation sites are indicated in bold.

|         |     |                                                                                        |     |
|---------|-----|----------------------------------------------------------------------------------------|-----|
| PfLRG-A | 1   | GTCTTTTACTGCCACCCACCCCTGCTCCAGAAAGTGTACCGAGTTCGTCTGCAACTCTCCATCTCTACGTGAATTTCCACCG     | 85  |
| cDNA1   | 1   | .....                                                                                  | 85  |
| cDNA2   | 1   | .....                                                                                  | 85  |
| PfLRG-B | 1   | .....                                                                                  | 85  |
| cDNA3   | 1   | .....                                                                                  | 85  |
| cDNA4   | 1   | .....C...A...C.....                                                                    | 85  |
| PfLRG-A | 86  | GCTTCCCCACACGAGCCAAGATGATCTCCGTTGAGTTACCCCAAGTCTCCAGCCTTGGCGTGGAGGCCCTCCAAGATCTTCCAAA  | 170 |
| cDNA1   | 86  | .....                                                                                  | 170 |
| cDNA2   | 86  | .....                                                                                  | 170 |
| PfLRG-B | 86  | .....TG.....G.....G..T.....G.....C..                                                   | 170 |
| cDNA3   | 86  | .....TG.....G.....G..T.....G.....C..                                                   | 170 |
| cDNA4   | 86  | .....G.....G..T.....G.....C..                                                          | 170 |
| PfLRG-A | 171 | CTCCAGGAACCTCACCTCTCCAACAACAGGTTAAAACTCTTCCAAGTGGCCTCTCCGTAACCTCCCACAACCTGCACACCTTG    | 255 |
| cDNA1   | 171 | .....                                                                                  | 255 |
| cDNA2   | 171 | .....                                                                                  | 255 |
| PfLRG-B | 171 | .....                                                                                  | 255 |
| cDNA3   | 171 | .....                                                                                  | 255 |
| cDNA4   | 171 | .....                                                                                  | 255 |
| PfLRG-A | 256 | GATCTCTCCACAAATCATCTAGAAGATCTACCTCCAGAGATCTTTACAAATGCAAGTAGCCTAACTCATTATCCCTCAGTGAAA   | 340 |
| cDNA1   | 256 | .....                                                                                  | 340 |
| cDNA2   | 256 | .....                                                                                  | 340 |
| PfLRG-B | 256 | .....G....TC.....C.....                                                                | 340 |
| cDNA3   | 256 | .....G....TC.....C.....                                                                | 340 |
| cDNA4   | 256 | .....G....TC.....C.....                                                                | 340 |
| PfLRG-A | 341 | ATCAACTAGCTGAACTGCGCCATCCTGGTTCCAACTCTTGAAGGACTCAGGATCCTAGGCCTTGATCACAATCAGGTGAAGGA    | 425 |
| cDNA1   | 341 | .....                                                                                  | 425 |
| cDNA2   | 341 | .....                                                                                  | 425 |
| PfLRG-B | 341 | .....G.....TG....C..G..G.A.....                                                        | 425 |
| cDNA3   | 341 | .....G.....TG....C..G..G.A.....                                                        | 425 |
| cDNA4   | 341 | .....G.....TG....C..G..G.A.....                                                        | 425 |
| PfLRG-A | 426 | GATCCCAATTCTTGTTTIGATAAGCTGAAGGAGTTGACATCTCTAGATCTCTCATTCAACCTCCTCCATCGCCTCGCTCCAGAG   | 510 |
| cDNA1   | 426 | .....                                                                                  | 510 |
| cDNA2   | 426 | .....                                                                                  | 510 |
| PfLRG-B | 426 | .....T...A.....A..A..G..                                                               | 510 |
| cDNA3   | 426 | .....T...A.....A..A..G..                                                               | 510 |
| cDNA4   | 426 | .....T...A.....A..A..G..                                                               | 510 |
| PfLRG-A | 511 | ATGTTCAAGTGGCTTAGATAAATTGGAGAGGTTAGTGCTGGAAGCAACCCCATCCAGTGCAATGTCAGGAAGACCTTCCATTGGC  | 595 |
| cDNA1   | 511 | .....                                                                                  | 595 |
| cDNA2   | 511 | .....C..T.....                                                                         | 595 |
| PfLRG-B | 511 | .....C.....T.....T..A.....T...A.GG...G.....                                            | 595 |
| cDNA3   | 511 | .....C.....T.....T..A.....T...A.GG...G.....                                            | 595 |
| cDNA4   | 511 | .....C.....T.....T..A.....T...A.GG...G.....                                            | 595 |
| PfLRG-A | 596 | ATCCCAAGCTGAGTGTGCTGCTGCCGAAGAACAGCAGCCTGACCCACATCTTAAGGGGAGTCTTTGACCCATTGCAACAACCTGGT | 680 |
| cDNA1   | 596 | .....                                                                                  | 680 |
| cDNA2   | 596 | .....C.....                                                                            | 680 |
| PfLRG-B | 596 | G.....A.....TG..A...T...G.....C.G--...G.C.....                                         | 677 |
| cDNA3   | 596 | G.....A.....TG..A...T...G.....C.G--...G.C.....                                         | 677 |
| cDNA4   | 596 | G.....A.....TG..A...T...G.....C.G--...G.C.....                                         | 677 |
| PfLRG-A | 681 | GCTGCTGGACCTCTCTGACAATGAGCTCAGCACAAATGGATGATCCAGTCTACAAGCCGTCTGCCAATCTCAGTCTTGATCTTTCA | 765 |
| cDNA1   | 681 | .....                                                                                  | 765 |
| cDNA2   | 681 | .....C.....                                                                            | 765 |
| PfLRG-B | 678 | .....T...C...C...CC...G...C..G...A.....T.....                                          | 762 |
| cDNA3   | 678 | .....T...C...C...CC...G...C..G...A.....T.....                                          | 762 |
| cDNA4   | 678 | .....T...C...C...CC...G...C..G...A.....T.....                                          | 762 |
| PfLRG-A | 766 | GGAACCCCTTGGGCGTGTGACTGCCGCTGGAGAATCTTCTAAGATGGCTCAATGATCACAACATCCATTTATATTCTAAGGAGG   | 850 |
| cDNA1   | 766 | .....A...                                                                              | 850 |
| cDNA2   | 766 | .....                                                                                  | 850 |
| PfLRG-B | 763 | .....G...T.....G.....C.....                                                            | 847 |
| cDNA3   | 763 | .....G...T.....G.....C.....                                                            | 847 |
| cDNA4   | 763 | .....G...T.....G.....C.....                                                            | 847 |
| PfLRG-A | 851 | AATTTGTCTGTGCTTCCCCCAAGCATTTCAAGGGTGAACATGCAATTTCACTTCAACCATACCAAATTTGTCCCTGCTAA       | 930 |
| cDNA1   | 851 | .....                                                                                  | 930 |
| cDNA2   | 851 | .....                                                                                  | 930 |
| PfLRG-B | 848 | .....G.....G.....                                                                      | 927 |
| cDNA3   | 848 | .....G.....G.....                                                                      | 927 |
| cDNA4   | 848 | .....G.....G.....                                                                      | 927 |

**Supplementary Figure S2. Comparison of the nucleotide sequences of *Protophthrops flavoviridis* LRGs.**

PfLRG-A and PfLRG-B were located on habu1\_scaffold2243:7438-6509 and habu1\_scaffold11684:3373-2447, respectively, in the draft genome sequence of the habu snake *P. flavoviridis*. Four cDNA clones 1–4 were obtained from the total liver RNA. Sequence identities have been represented by dots.
